# Supplementary material for: Self-management approaches for osteoarthritis in the hand: a 2×2 factorial randomised trial
Source: HighWire-hosted journal article supplement (doi:10.1136/annrheumdis-2013-203938), 2013-10-10
Supplement: annrheumdis-2013-203938supp_tables.pdf [file annrheumdis-2013-203938supp_tables.pdf]

Table S1: Baseline characteristics of participants who responded<sup>||</sup> at each follow-up time point

| Characteristic                                                                              | Baseline<br>N=257 | 3-months<br>N=232 | 6-months<br>N=218 | 12-months<br>N=219 |
|---------------------------------------------------------------------------------------------|-------------------|-------------------|-------------------|--------------------|
| Demographic data                                                                            |                   |                   |                   |                    |
| General practice                                                                            |                   |                   |                   |                    |
| A                                                                                           | 16 (6)            | 12 (5)            | 13 (6)            | 14 (6)             |
| B                                                                                           | 39 (15)           | 36 (16)           | 33 (15)           | 34 (16)            |
| C                                                                                           | 67 (26)           | 63 (27)           | 63 (29)           | 60 (27)            |
| D                                                                                           | 62 (24)           | 56 (24)           | 53 (24)           | 53 (24)            |
| E                                                                                           | 73 (28)           | 65 (28)           | 56 (26)           | 58 (26)            |
| Mean (SD): Age (years)                                                                      | 65.8 (9.1)        | 66.4 (9.2)        | 66.2 (9.1)        | 65.6 (9.0)         |
| Female                                                                                      | 170 (66)          | 152 (66)          | 147 (67)          | 149 (68)           |
| Married                                                                                     | 165 (65)          | 145 (63)          | 140 (65)          | 138 (64)           |
| Routine or manual occupation* <sup>†</sup>                                                  | 121 (47)          | 107 (46)          | 96 (44)           | 103 (47)           |
| Currently working                                                                           | 76 (30)           | 64 (28)           | 60 (28)           | 64 (29)            |
| Mean (SD): Age when left school                                                             | 16 (1.2)          | 16 (1.2)          | 16 (1.2)          | 16 (1.2)           |
| Left school to go to full time education or university                                      | 41 (16)           | 37 (16)           | 37 (17)           | 35 (16)            |
| Gained qualifications through study as an adult                                             | 126 (50)          | 113 (50)          | 111 (52)          | 112 (52)           |
| General health and quality of life                                                          |                   |                   |                   |                    |
| Body mass index $\geq 25.0$ kg/m <sup>2</sup> (overweight/obese) <sup>‡</sup>               | 169 (68)          | 150 (67)          | 143 (68)          | 143 (68)           |
| Mean (SD): SF-12: Physical component (0-100) <sup>*</sup>                                   | 40.1 (10.7)       | 40.1 (10.7)       | 40.1 (10.7)       | 40.5 (10.6)        |
| Median (IQR): SF-12: Mental component (0-100) <sup>*</sup>                                  | 53.4 (43.3, 59.2) | 53.8 (44.5, 59.3) | 53.8 (44.0, 59.3) | 53.7 (43.9, 59.4)  |
| Clinical characteristics of hand problem                                                    |                   |                   |                   |                    |
| Pain in both hands in last 12 months                                                        | 225 (88)          | 202 (87)          | 193 (89)          | 195 (89)           |
| Median (IQR): Number of years with hand problem <sup>*</sup>                                | 5.0 (2.0, 10.0)   | 5.0 (2.0, 10.0)   | 5.0 (2.4, 10.0)   | 5.0 (2.0, 10.0)    |
| Mean (SD): AUSCAN - pain (0-20) <sup>*</sup>                                                | 9.4 (3.6)         | 9.3 (3.7)         | 9.3 (3.6)         | 9.4 (3.6)          |
| Mean (SD): AUSCAN - stiffness (0-4) <sup>*</sup>                                            | 1.5 (1.0)         | 1.5 (1.0)         | 1.5 (1.1)         | 1.5 (1.0)          |
| Mean (SD): AUSCAN - function (0-36) <sup>*</sup>                                            | 14.8 (7.6)        | 14.6 (7.6)        | 14.8 (7.5)        | 14.7 (7.4)         |
| Mean (SD): AUSCAN - total (0-12) <sup>*</sup>                                               | 5.0 (2.2)         | 5.0 (2.2)         | 5.0 (2.2)         | 5.0 (2.2)          |
| Mean (SD): Arthritis self-efficacy pain subscale (1-10) <sup>*</sup>                        | 5.1 (1.8)         | 5.1 (1.8)         | 5.1 (1.8)         | 5.1 (1.8)          |
| Mean (SD): Hand pain severity on average last 3 days (0-10) <sup>*</sup>                    | 4.6 (2.0)         | 4.6 (2.0)         | 4.6 (2.0)         | 4.6 (2.0)          |
| Mean (SD): Severity of main functional problem, on average, last 3 days (0-10) <sup>*</sup> | 5.0 (2.4)         | 5.0 (2.4)         | 5.1 (2.4)         | 5.1 (2.4)          |
| Mean (SD): Satisfaction with hand function last 3 days (0-10) <sup>*</sup>                  | 4.8 (2.3)         | 4.8 (2.3)         | 4.8 (2.3)         | 4.8 (2.2)          |
| Median (IQR): Grip strength (lbs) <sup>*</sup>                                              | 33.5 (22.5, 47.5) | 33.5 (22.5, 48.0) | 32.5 (22.0, 47.5) | 32.5 (21.5, 47.5)  |

|                                                        |                   |                   |                   |                   |
|--------------------------------------------------------|-------------------|-------------------|-------------------|-------------------|
| Mean (SD): Pinch strength (lbs) <sup>*</sup>           | 8.9 (3.4)         | 9.0 (3.4)         | 8.9 (3.4)         | 8.9 (3.4)         |
| Median (IQR): Grip ability test (seconds) <sup>*</sup> | 32.0 (26.5, 40.4) | 32.1 (26.5, 40.7) | 32.1 (26.0, 41.5) | 32.1 (26.4, 41.3) |
| ACR criteria met <sup>§</sup>                          | 230 (90)          | 208 (90)          | 195 (89)          | 194 (89)          |
| Unilateral or bilateral thumb OA                       | 210 (82)          | 193 (83)          | 182 (84)          | 183 (84)          |

Figures are numbers and percentages unless otherwise stated. Median (IQR) given for outcome measures with a skewed distribution. Total AUSCAN score calculated as (pain/5) + stiffness + (function/9). Abbreviations: SF-12 = Short Form Health Survey 12 (version 2), AUSCAN = Australian/Canadian Hand Osteoarthritis Index, ACR = American College of Rheumatology, OA = osteoarthritis. \* = Data based on imputed data; † = Based on the “lower supervisory/technical”, “Semi-routine” and “Routine” groups of the UK Standard Occupation Classification (2000) for current or most recent paid employment; ‡ = Body mass index grouping defined according to the World Health Organisation (WHO); § = ACR criteria based on clinical features only (symptom frequency assessed prior to clinical assessment); || = Responding is defined as participants who return the self-complete questionnaire or complete minimum data at the respective time point.

Table S2: Interaction effects for the primary outcome measure

|                           | 3-months |                                     | 6-months |                                     | 12-months |                                     |
|---------------------------|----------|-------------------------------------|----------|-------------------------------------|-----------|-------------------------------------|
|                           | N (%)    | Interaction coefficient<br>(95% CI) | N (%)    | Interaction coefficient<br>(95% CI) | N (%)     | Interaction coefficient<br>(95% CI) |
| OARSI responder criteria  |          |                                     |          |                                     |           |                                     |
| Leaflet and advice (L&A)  | 8 (12)   |                                     | 14 (22)  |                                     | 9 (14)    |                                     |
| Joint protection (JP)     | 16 (26)  | 0.29                                | 17 (28)  | 1.81                                | 15 (24)   | 0.50                                |
| Hand Exercises (HEX)      | 15 (23)  | (0.07, 1.25)                        | 13 (20)  | (0.53, 6.22)                        | 18 (27)   | (0.13, 1.92)                        |
| Combined therapy (JP&HEX) | 11 (17)  |                                     | 24 (37)  |                                     | 20 (30)   |                                     |

Descriptive statistics based on unadjusted imputed data; interaction coefficients on adjusted imputed data (i.e. adjusted for age, gender, social class, length of time with a hand condition, general practice and the two main effects of interest. Interaction coefficients are odds ratios from logistic regression models; confidence intervals containing one are non-significant interactions. Abbreviations: CI = confidence interval

Table S3: Frequencies of the global assessment of change question (percentages estimated from imputed data)

| Global assessment of change   |                |             |                 |              |
|-------------------------------|----------------|-------------|-----------------|--------------|
|                               | No JP<br>N=130 | JP<br>N=127 | No HEx<br>N=127 | HEx<br>N=130 |
| 3-months                      |                |             |                 |              |
| Completely better/much better | 10 (8)         | 9 (7)       | 9 (7)           | 10 (8)       |
| Better                        | 29 (22)        | 36 (28)     | 20 (16)         | 43 (33)      |
| No change                     | 61 (47)        | 66 (52)     | 74 (58)         | 53 (41)      |
| Worse/much worse              | 29 (22)        | 18 (14)     | 23 (18)         | 23 (18)      |
| 6-months                      |                |             |                 |              |
| Completely better/much better | 9 (7)          | 11 (9)      | 6 (5)           | 14 (11)      |
| Better                        | 21 (16)        | 39 (31)     | 20 (16)         | 39 (30)      |
| No change                     | 62 (48)        | 55 (43)     | 69 (54)         | 48 (37)      |
| Worse/much worse              | 38 (29)        | 20 (16)     | 32 (25)         | 27 (21)      |
| 12-months                     |                |             |                 |              |
| Completely better/much better | 10 (8)         | 13 (10)     | 9 (7)           | 14 (11)      |
| Better                        | 23 (18)        | 33 (26)     | 20 (16)         | 36 (28)      |
| No change                     | 47 (36)        | 48 (38)     | 55 (43)         | 40 (31)      |
| Worse/much worse              | 49 (38)        | 33 (26)     | 43 (34)         | 39 (30)      |

Figures are number (percentages).

JP = joint protection, HEx = hand exercise

Supplementary Table S4: Treatment fidelity

|                                                                                           | 3-months                   |          | 6-months                   |         | 12-months                  |         |
|-------------------------------------------------------------------------------------------|----------------------------|----------|----------------------------|---------|----------------------------|---------|
|                                                                                           | No HEx                     | HEx      | No HEx                     | HEx     | No HEx                     | HEx     |
| <b>Hand exercise fidelity</b>                                                             |                            |          |                            |         |                            |         |
| Last week, frequency of completion of a structured exercise program                       |                            |          |                            |         |                            |         |
| Never                                                                                     | 47 (43)                    | 11 (10)  | 46 (44)                    | 8 (8)   | 35 (34)                    | 11 (10) |
| Almost never                                                                              | 16 (15)                    | 2 (2)    | 18 (17)                    | 11 (11) | 16 (16)                    | 8 (8)   |
| Sometimes                                                                                 | 26 (24)                    | 23 (20)  | 27 (26)                    | 39 (37) | 29 (28)                    | 35 (33) |
| Fairly often                                                                              | 11 (10)                    | 35 (30)  | 6 (6)                      | 29 (28) | 11 (11)                    | 34 (32) |
| Very often                                                                                | 7 (6)                      | 38 (33)  | 4 (4)                      | 14 (13) | 8 (8)                      | 17 (16) |
| Always                                                                                    | 3 (3)                      | 6 (5)    | 3 (3)                      | 4 (4)   | 3 (3)                      | 2 (2)   |
| Chi-square ( $\chi^2$ ) <sup>1</sup> (d.f.=4)                                             | $\chi^2 = 67.3; p < 0.001$ |          | $\chi^2 = 50.6; p < 0.001$ |         | $\chi^2 = 29.5; p < 0.001$ |         |
| Last month, number of times a week done exercises specifically designed for hand problems |                            |          |                            |         |                            |         |
| Never                                                                                     | $\alpha$                   | $\alpha$ | 38 (37)                    | 15 (14) | 37 (37)                    | 12 (11) |
| Once a week                                                                               | $\alpha$                   | $\alpha$ | 11 (11)                    | 9 (9)   | 7 (7)                      | 16 (15) |
| Twice a week                                                                              | $\alpha$                   | $\alpha$ | 3 (3)                      | 21 (20) | 5 (5)                      | 22 (21) |
| Three times a week                                                                        | $\alpha$                   | $\alpha$ | 6 (6)                      | 19 (18) | 10 (10)                    | 22 (21) |
| Four times a week                                                                         | $\alpha$                   | $\alpha$ | 6 (6)                      | 10 (10) | 3 (3)                      | 4 (4)   |
| Five times a week                                                                         | $\alpha$                   | $\alpha$ | 2 (2)                      | 4 (4)   | 2 (2)                      | 6 (6)   |
| Six times a week                                                                          | $\alpha$                   | $\alpha$ | 2 (2)                      | 2 (2)   | 3 (3)                      | 3 (3)   |
| Once every day                                                                            | $\alpha$                   | $\alpha$ | 19 (18)                    | 12 (12) | 19 (19)                    | 11 (10) |
| Twice every day                                                                           | $\alpha$                   | $\alpha$ | 17 (16)                    | 12 (12) | 15 (15)                    | 11 (10) |
| Chi-square ( $\chi^2$ ) <sup>2</sup> (d.f.=4)                                             |                            |          | $\chi^2 = 25.6; p < 0.001$ |         | $\chi^2 = 34.2; p < 0.001$ |         |
| When doing hand exercises, how long do you spend doing them?                              |                            |          |                            |         |                            |         |
| Less than 5 minutes                                                                       | $\alpha$                   | $\alpha$ | 44 (43)                    | 30 (28) | 37 (39)                    | 29 (28) |
| Five minutes to less than ten minutes                                                     | $\alpha$                   | $\alpha$ | 24 (24)                    | 38 (36) | 25 (26)                    | 47 (45) |
| Ten minutes to less than fifteen minutes                                                  | $\alpha$                   | $\alpha$ | 2 (2)                      | 14 (13) | 3 (3)                      | 17 (16) |
| Fifteen minutes to less than an hour                                                      | $\alpha$                   | $\alpha$ | 1 (1)                      | 8 (8)   | 1 (1)                      | 0 (0)   |
| Half an hour or more                                                                      | $\alpha$                   | $\alpha$ | 1 (1)                      | 2 (2)   | 0 (0)                      | 1 (1)   |
| I don't do hand exercises                                                                 | $\alpha$                   | $\alpha$ | 30 (29)                    | 14 (13) | 30 (31)                    | 11 (11) |
| Chi-square ( $\chi^2$ ) <sup>3</sup> (d.f.=3)                                             |                            |          | $\chi^2 = 25.8; p < 0.001$ |         | $\chi^2 = 25.1; p < 0.001$ |         |
| <b>Joint protection fidelity</b>                                                          |                            |          |                            |         |                            |         |

|                                                                         | No JP                   | JP        | No JP                  | JP        | No JP                     | JP        |
|-------------------------------------------------------------------------|-------------------------|-----------|------------------------|-----------|---------------------------|-----------|
| Energy conservation/fatigue (1-6)[13,22]                                |                         |           |                        |           |                           |           |
| N                                                                       | 114                     | 110       | 107                    | 103       | 101                       | 106       |
| Mean (SD)                                                               | 3.4 (1.2)               | 3.9 (1.0) | 3.4 (1.1)              | 3.8 (1.0) | 3.4 (1.1)                 | 3.8 (1.1) |
| Adjusted <sup>5</sup> mean difference (95% CI)                          | 0.40 (0.17, 0.63)       |           | 0.46 (0.23, 0.69)      |           | 0.39 (0.18, 0.60)         |           |
| p-value                                                                 | <b>p=0.001</b>          |           | <b>p &lt;0.001</b>     |           | <b>p &lt;0.001</b>        |           |
| Joint protection use (1-6)[13,22]                                       |                         |           |                        |           |                           |           |
| N                                                                       | 115                     | 110       | 107                    | 103       | 103                       | 106       |
| Mean (SD)                                                               | 3.4 (1.1)               | 4.2 (1.0) | 3.5 (1.2)              | 4.2 (1.0) | 3.7 (1.2)                 | 4.2 (1.0) |
| Adjusted <sup>5</sup> mean difference (95% CI)                          | 0.73 (0.52, 0.93)       |           | 0.71 (0.48, 0.94)      |           | 0.50 (0.27, 0.72)         |           |
| p-value                                                                 | <b>p &lt;0.001</b>      |           | <b>p &lt;0.001</b>     |           | <b>p &lt;0.001</b>        |           |
| Carry on working through the pain when doing everyday activities[13,22] |                         |           |                        |           |                           |           |
| Never                                                                   | 5 (4)                   | 3 (3)     | 5 (5)                  | 3 (3)     | 1 (1)                     | 3 (3)     |
| Almost never                                                            | 6 (5)                   | 15 (14)   | 6 (6)                  | 10 (10)   | 10 (10)                   | 20 (19)   |
| Sometimes                                                               | 29 (25)                 | 35 (32)   | 37 (35)                | 37 (36)   | 25 (24)                   | 22 (21)   |
| Fairly often                                                            | 25 (22)                 | 26 (24)   | 19 (18)                | 24 (23)   | 21 (20)                   | 31 (29)   |
| Very often                                                              | 36 (31)                 | 18 (16)   | 28 (26)                | 17 (17)   | 34 (33)                   | 15 (14)   |
| Always                                                                  | 14 (12)                 | 13 (12)   | 12 (11)                | 12 (12)   | 12 (12)                   | 15 (14)   |
| Chi-square( $\chi^2$ ) <sup>4</sup> (d.f.=4)                            | $\chi^2 = 8.2$ (p=0.08) |           | $\chi^2 = 3.4$ (p=0.5) |           | $\chi^2 = 14.0$ (p=0.007) |           |

1 = Analysis categories: "Never", "Almost never", "Sometimes", "Fairly often", "Very often or always" due to small N

2 = Analysis categories: "Never", "1-2 times a week", "3-4 times a week", "5-6 times a week", "1-2 times per day" due to small N

3 = Analysis categories: "Never do hand exercises", "< 5-minutes", "5-10 minutes", "10 minutes or more" due to small N

4 = Analysis categories: "Never or almost never", "Sometimes", "Fairly often", "Very often", "Always" due to small N

5 = Adjusted for the baseline for the outcome of interest and the main effect: No HEx vs HEx

$\alpha$  = Data not collected at the 3-month time point

Abbreviations: HEx = Hand exercises, JP = Joint protection. CI = confidence interval, d.f. = degrees of freedom. P-values <0.05 are highlighted

Table S5: Treatment effectiveness for primary and secondary outcome measures by main treatment effects – missing data not imputed

| Outcome measure                         | 3-months            |            |                     |            | 6-months            |            |                     |            | 12-months           |            |                     |            |
|-----------------------------------------|---------------------|------------|---------------------|------------|---------------------|------------|---------------------|------------|---------------------|------------|---------------------|------------|
|                                         | No JP <sup>†</sup>  | JP         | No HEx <sup>†</sup> | HEx        | No JP <sup>†</sup>  | JP         | No HEx <sup>†</sup> | HEx        | No JP <sup>†</sup>  | JP         | No HEx <sup>†</sup> | HEx        |
| OARSI responder criteria (%)            |                     |            |                     |            |                     |            |                     |            |                     |            |                     |            |
| N                                       | 115                 | 107        | 112                 | 110        | 108                 | 108        | 107                 | 109        | 100                 | 102        | 94                  | 108        |
| N (%) meeting responder criteria        | 16 (14)             | 23 (22)    | 20 (18)             | 19 (17)    | 20 (19)             | 35 (32)    | 24 (22)             | 31 (28)    | 20 (20)             | 30 (29)    | 18 (19)             | 32 (30)    |
| Adjusted odds ratio (95% CI)            | 1.76 (0.83, 3.73)   |            | 0.81 (0.39, 1.67)   |            | 2.61 (1.32, 5.15)   |            | 1.20 (0.62, 2.31)   |            | 1.91 (0.95, 3.83)   |            | 1.96 (0.98, 3.94)   |            |
| Global assessment of change (%)         |                     |            |                     |            |                     |            |                     |            |                     |            |                     |            |
| N                                       | 118                 | 110        | 115                 | 113        | 109                 | 109        | 108                 | 110        | 103                 | 103        | 97                  | 109        |
| N (%) improved*                         | 36 (31)             | 38 (35)    | 26 (23)             | 48 (42)    | 23 (21)             | 45 (41)    | 21 (19)             | 47 (43)    | 25 (24)             | 38 (37)    | 20 (21)             | 43 (39)    |
| Adjusted odds ratio (95% CI)            | 1.15 (0.61, 2.17)   |            | 2.73 (1.44, 5.18)   |            | 3.49 (1.76, 6.92)   |            | 3.41 (1.75, 6.66)   |            | 2.20 (1.15, 4.22)   |            | 2.47 (1.29, 4.74)   |            |
| AUSCAN Pain (0-20)                      |                     |            |                     |            |                     |            |                     |            |                     |            |                     |            |
| N                                       | 116                 | 109        | 114                 | 111        | 109                 | 108        | 107                 | 110        | 108                 | 109        | 103                 | 114        |
| Mean (SD)                               | 9.2 (3.4)           | 9.2 (3.0)  | 9.5 (3.4)           | 8.9 (3.0)  | 9.5 (3.9)           | 9.0 (3.9)  | 9.6 (3.9)           | 8.9 (4.0)  | 9.4 (4.0)           | 9.4 (3.7)  | 9.7 (3.7)           | 9.1 (4.0)  |
| Adjusted mean difference (95% CI)       | -0.17 (-0.87, 0.53) |            | -0.26 (-0.95, 0.44) |            | -0.76 (-1.69, 0.16) |            | -0.23 (-1.14, 0.69) |            | -0.36 (-1.28, 0.57) |            | -0.22 (-1.14, 0.70) |            |
| AUSCAN Stiffness (0-4)                  |                     |            |                     |            |                     |            |                     |            |                     |            |                     |            |
| N                                       | 118                 | 110        | 114                 | 114        | 109                 | 108        | 107                 | 110        | 108                 | 105        | 103                 | 110        |
| Mean (SD)                               | 1.5 (1.0)           | 1.4 (1.0)  | 1.6 (1.0)           | 1.3 (1.0)  | 1.6 (1.0)           | 1.4 (1.0)  | 1.5 (1.1)           | 1.5 (1.0)  | 1.6 (0.9)           | 1.5 (1.0)  | 1.7 (0.9)           | 1.4 (1.0)  |
| Adjusted mean difference (95% CI)       | 0.00 (-0.20, 0.20)  |            | -0.19 (-0.39, 0.01) |            | -0.22 (-0.45, 0.00) |            | 0.09 (-0.13, 0.31)  |            | -0.09 (-0.31, 0.14) |            | -0.19 (-0.41, 0.04) |            |
| AUSCAN Function (0-36)                  |                     |            |                     |            |                     |            |                     |            |                     |            |                     |            |
| N                                       | 118                 | 108        | 112                 | 114        | 109                 | 108        | 107                 | 110        | 108                 | 105        | 102                 | 111        |
| Mean (SD)                               | 15.2 (7.8)          | 15.0 (6.9) | 15.8 (7.8)          | 14.4 (6.8) | 14.6 (7.9)          | 15.1 (7.6) | 15.7 (7.6)          | 14.0 (7.9) | 15.2 (7.9)          | 16.1 (7.6) | 16.3 (7.6)          | 15.0 (7.9) |
| Adjusted mean difference (95% CI)       | -1.10 (-2.40, 0.19) |            | -0.70 (-1.97, 0.57) |            | -0.79 (-2.33, 0.75) |            | -0.83 (-2.34, 0.69) |            | -0.22 (-1.85, 1.40) |            | -0.74 (-2.35, 0.87) |            |
| AUSCAN Total (0-12)                     |                     |            |                     |            |                     |            |                     |            |                     |            |                     |            |
| N                                       | 115                 | 107        | 112                 | 110        | 109                 | 108        | 107                 | 110        | 106                 | 104        | 100                 | 110        |
| Mean (SD)                               | 5.1 (2.1)           | 4.9 (1.9)  | 5.2 (2.2)           | 4.7 (1.9)  | 5.1 (2.4)           | 4.9 (2.4)  | 5.2 (2.4)           | 4.8 (2.3)  | 5.2 (2.3)           | 5.2 (2.4)  | 5.4 (2.2)           | 4.9 (2.4)  |
| Adjusted mean difference (95% CI)       | -0.19 (-0.58, 0.19) |            | -0.30 (-0.69, 0.08) |            | -0.47 (-0.97, 0.02) |            | -0.03 (-0.52, 0.46) |            | -0.20 (-0.72, 0.32) |            | -0.30 (-0.82, 0.21) |            |
| Arthritis self-efficacy for pain (1-10) |                     |            |                     |            |                     |            |                     |            |                     |            |                     |            |
| N                                       | 114                 | 110        | 110                 | 114        | 107                 | 103        | 104                 | 106        | 101                 | 104        | 100                 | 105        |
| Mean (SD)                               | 5.6 (1.9)           | 6.3 (1.7)  | 5.7 (2.0)           | 6.1 (1.6)  | 5.7 (1.9)           | 6.5 (1.7)  | 6.0 (1.8)           | 6.2 (1.8)  | 5.4 (2.0)           | 6.0 (1.7)  | 5.6 (1.8)           | 5.8 (2.0)  |
| Adjusted mean difference (95% CI)       | 0.78 (0.36, 1.21)   |            | 0.17 (-0.24, 0.59)  |            | 0.81 (0.37, 1.25)   |            | 0.24 (-0.19, 0.68)  |            | 0.66 (0.18, 1.15)   |            | 0.16 (-0.31, 0.64)  |            |
| Hand pain severity last 3 days (0-10)   |                     |            |                     |            |                     |            |                     |            |                     |            |                     |            |
| N                                       | 115                 | 109        | 109                 | 115        | 104                 | 95         | 96                  | 103        | 102                 | 103        | 101                 | 104        |
| Mean (SD)                               | 4.4 (2.2)           | 4.2 (1.9)  | 4.6 (2.2)           | 4.1 (1.9)  | 4.1 (2.2)           | 4.4 (2.1)  | 4.1 (2.0)           | 4.3 (2.3)  | 4.5 (2.2)           | 4.6 (2.3)  | 4.8 (2.2)           | 4.2 (2.3)  |
| Adjusted mean difference (95% CI)       | -0.30 (-0.77, 0.16) |            | -0.19 (-0.65, 0.27) |            | -0.02 (-0.54, 0.51) |            | 0.42 (-0.09, 0.94)  |            | -0.12 (-0.68, 0.44) |            | -0.31 (-0.86, 0.24) |            |

|                                                           |                     |             |                     |             |                      |             |                     |             |                     |             |                      |             |
|-----------------------------------------------------------|---------------------|-------------|---------------------|-------------|----------------------|-------------|---------------------|-------------|---------------------|-------------|----------------------|-------------|
| Severity of worse problem in the last 3-days (0-10)       |                     |             |                     |             |                      |             |                     |             |                     |             |                      |             |
| N                                                         | 114                 | 108         | 108                 | 114         | 101                  | 93          | 95                  | 99          | 101                 | 102         | 101                  | 102         |
| Mean (SD)                                                 | 4.7 (2.3)           | 4.6 (2.2)   | 5.0 (2.3)           | 4.4 (2.2)   | 4.8 (2.4)            | 4.7 (2.6)   | 4.9 (2.5)           | 4.7 (2.4)   | 4.9 (2.2)           | 4.7 (2.5)   | 5.2 (2.2)            | 4.4 (2.4)   |
| Adjusted mean difference (95% CI)                         | -0.24 (-0.76, 0.29) |             | -0.42 (-0.94, 0.09) |             | -0.63 (-1.26, 0.00)  |             | -0.08 (-0.70, 0.55) |             | -0.50 (-1.09, 0.09) |             | -0.62 (-1.19, -0.04) |             |
| Satisfaction with hand function in the last 3 days (0-10) |                     |             |                     |             |                      |             |                     |             |                     |             |                      |             |
| N                                                         | 115                 | 108         | 109                 | 114         | 104                  | 95          | 96                  | 103         | 103                 | 103         | 101                  | 105         |
| Mean (SD)                                                 | 4.7 (2.3)           | 4.3 (2.2)   | 4.9 (2.4)           | 4.2 (2.1)   | 4.5 (2.4)            | 3.9 (2.3)   | 4.2 (2.4)           | 4.3 (2.4)   | 4.9 (2.3)           | 4.7 (2.4)   | 5.2 (2.2)            | 4.4 (2.4)   |
| Adjusted mean difference (95% CI)                         | -0.48 (-1.03, 0.06) |             | -0.52 (-1.06, 0.02) |             | -0.79 (-1.41, -0.18) |             | 0.33 (-0.28, 0.93)  |             | -0.30 (-0.89, 0.29) |             | -0.58 (-1.17, 0.00)  |             |
| Grip strength (lbs)                                       |                     |             |                     |             |                      |             |                     |             |                     |             |                      |             |
| N                                                         | N/A                 | N/A         | N/A                 | N/A         | 104                  | 95          | 96                  | 103         | N/A                 | N/A         | N/A                  | N/A         |
| Mean (SD)                                                 | N/A                 | N/A         | N/A                 | N/A         | 42.9 (23.5)          | 39.8 (20.5) | 39.9 (21.7)         | 42.8 (22.5) | N/A                 | N/A         | N/A                  | N/A         |
| Adjusted mean difference (95% CI)                         | N/A                 |             | N/A                 |             | -0.44 (-3.29, 2.42)  |             | 1.57 (-1.27, 4.41)  |             | N/A                 |             | N/A                  |             |
| Pinch strength (lbs)                                      |                     |             |                     |             |                      |             |                     |             |                     |             |                      |             |
| N                                                         | N/A                 | N/A         | N/A                 | N/A         | 103                  | 95          | 96                  | 102         | N/A                 | N/A         | N/A                  | N/A         |
| Mean (SD)                                                 | N/A                 | N/A         | N/A                 | N/A         | 9.2 (3.6)            | 8.9 (3.6)   | 8.7 (3.4)           | 9.3 (3.7)   | N/A                 | N/A         | N/A                  | N/A         |
| Adjusted mean difference (95% CI)                         | N/A                 |             | N/A                 |             | -0.18 (-0.75, 0.39)  |             | 0.26 (-0.31, 0.82)  |             | N/A                 |             | N/A                  |             |
| Grip ability test (GAT) (seconds)                         |                     |             |                     |             |                      |             |                     |             |                     |             |                      |             |
| N                                                         | N/A                 | N/A         | N/A                 | N/A         | 104                  | 95          | 96                  | 103         | N/A                 | N/A         | N/A                  | N/A         |
| Mean (SD)                                                 | N/A                 | N/A         | N/A                 | N/A         | 33.7 (20.4)          | 31.0 (10.2) | 34.5 (20.9)         | 30.4 (10.2) | N/A                 | N/A         | N/A                  | N/A         |
| Adjusted mean difference (95% CI)                         | N/A                 |             | N/A                 |             | -1.01 (-3.41, 1.39)  |             | -0.82 (-3.20, 1.56) |             | N/A                 |             | N/A                  |             |
| SF-12: physical component (0-100)                         |                     |             |                     |             |                      |             |                     |             |                     |             |                      |             |
| N                                                         | 113                 | 104         | 105                 | 112         | 106                  | 101         | 102                 | 105         | 100                 | 100         | 100                  | 100         |
| Mean (SD)                                                 | 40.7 (10.9)         | 40.4 (10.2) | 39.9 (11.2)         | 41.2 (9.8)  | 41.6 (10.7)          | 40.2 (10.3) | 40.2 (10.9)         | 41.7 (10.1) | 41.4 (10.8)         | 41.1 (10.4) | 40.4 (10.4)          | 42.2 (10.7) |
| Adjusted mean difference (95% CI)                         | 0.97 (-0.89, 2.84)  |             | 0.59 (-1.25, 2.43)  |             | 0.05 (-1.93, 2.02)   |             | 1.18 (-0.75, 3.11)  |             | 0.08 (-1.89, 2.06)  |             | 1.24 (-0.71, 3.19)   |             |
| SF-12: mental component (0-100)                           |                     |             |                     |             |                      |             |                     |             |                     |             |                      |             |
| N                                                         | 113                 | 104         | 105                 | 112         | 106                  | 101         | 102                 | 105         | 100                 | 100         | 100                  | 100         |
| Mean (SD)                                                 | 50.4 (10.8)         | 51.5 (9.9)  | 51.1 (10.4)         | 50.7 (10.3) | 50.8 (9.9)           | 52.5 (9.7)  | 51.8 (10.4)         | 51.4 (9.2)  | 51.0 (10.7)         | 52.3 (10.2) | 51.5 (11.1)          | 51.8 (9.7)  |
| Adjusted mean difference (95% CI)                         | -1.37 (-3.37, 0.63) |             | 0.00 (-1.96, 1.96)  |             | -0.52 (-2.59, 1.56)  |             | 0.44 (-1.59, 2.46)  |             | -0.58 (-2.86, 1.70) |             | 1.03 (-1.23, 3.28)   |             |

Abbreviations: CI = confidence interval, JP = joint protection, HEx = hand exercise, N/A = not applicable, AUSCAN = Australian Canadian Hand Osteoarthritis Index, SF-12 = Short Form Health Survey 12 (version 2). \* = "Improved" defined as "completely better", "much better", or "better" on the global assessment of change question; † = Reference category. Results are adjusted for baseline (except for measures derived using the global assessment of change), age, gender, social class, GP practice, length of time with a hand condition and the other main effect of interest. Total AUSCAN score calculated as (pain/5) + stiffness + (function/9)



Table S6: Per-protocol analysis of the primary outcome (OARSI) responder criteria at the primary endpoint (6-month follow-up)

| Outcome measure                           | 6-months          |         |                   |         |
|-------------------------------------------|-------------------|---------|-------------------|---------|
|                                           | No JP*            | JP      | No HEx*           | HEx     |
| N                                         | 109               | 85      | 107               | 87      |
| “Responders” (OARSI), n (%)               | 24 (22)           | 29 (34) | 26 (24)           | 27 (31) |
| Adjusted <sup>3</sup> odds ratio (95% CI) | 1.95 (0.94, 4.02) |         | 1.47 (0.73, 2.96) |         |

Footnote: Analysis was defined to be per protocol if participants were in the leaflet and advice arm or attended: session 1, 2, 3 & 4; sessions 1, 2 & 4; sessions 1, 3 & 4; or sessions 1 & 4 for the OT intervention arms. JP = joint protection, HEx = hand exercise, CI = confidence interval. \* = reference category
